# Supplementary material
Source: PubMed Central journal article supplement (PMC10105252)

## Trends in gabapentinoid prescribing: an observational study in UK primary care using the Clinical Practice Research Datalink. Supplementary Materials

### Page number

|    |                                                                                                                                                 |
|----|-------------------------------------------------------------------------------------------------------------------------------------------------|
| 1  | Table of contents                                                                                                                               |
| 2  | Definitions                                                                                                                                     |
| 5  | Supplementary Table 1: Annual incidence rate of first gabapentinoid prescriptions (per 100,000 patient years) 1997 – 2019.                      |
| 6  | Supplementary Table 2: Annual prevalence rate of gabapentinoid prescriptions (per 100,000 patient years) 1997 – 2019.                           |
| 7  | Supplementary Table 3: Incidence of first gabapentinoid prescriptions (per 100,000 patient years), by age group and sex, 1997- 2019.            |
| 8  | Supplementary Table 4: Licensed and unlicensed indications resulting from meta-analysis of CPRD GOLD and AURUM data.                            |
| 9  | Supplementary Figure 1: Joinpoint Analysis Annual trend in incident gabapentinoid prescribing per 100,000 patient years (1997-2019)             |
| 10 | Supplementary Figure 2: Joinpoint Analysis Monthly trend in incident gabapentinoid prescribing per 100,000 patient years (Oct-2017 to Sep-2019) |
| 11 | Supplementary Figure 3: Joinpoint Analysis Annual trend in prevalent gabapentinoid prescribing 100,000 patient years (1997-2019)                |
| 12 | Supplementary Figure 4: Joinpoint Analysis Monthly trend in prevalent gabapentinoid prescribing 100,000 patient years (Oct-2017 to Sep-2019)    |

## Definitions

### Practice migration

The GOLD dataset is the primary care records from practices using the Vision system for computerised records and AURUM is from the EMIS system. Although the information they contain is essentially the same, they are held separately as the formats are slightly different and the interfaces that the GPs use to create the data are different. Some practices have “migrated” their computer system from Vision to EMIS and therefore individuals registered with these practices appear in both datasets. To ensure that the datasets were mutually exclusive and allow valid meta-analysis, people from these migrator practices were removed from the GOLD dataset.

### Incident prescriptions

An incident prescription was defined as the first in the CPRD record. We required this prescription to occur between 01/04/1997 (gabapentin) and 01/04/2004 (pregabalin) and 30/09/2019, but used the whole of the available record, which for some people beginnings before 1997, in the definition of incidence. Where more than one product was prescribed on the same date (e.g. gabapentin tablets in two different strengths), they were considered a single prescription.

### Duration of treatment

Treatment period defined to end if no further prescription within 56 days

GOLD: merge with common dosages look up file

1. Create indicator if no prescription for 56 days (or no further prescription)
2. Therapy start date = first script date and new script date if no script for 56 days
3. Calculate script duration as numdays if available, or qty/daily\_dose if not, for the last script in the treatment period or if more than 30 days between scripts
4. Calculate script duration as number of days between scripts if  $\leq 30$  and  $\geq 7$
5. If time between scripts is  $< 7$  days then use numdays or qty/daily\_dose for duration
6. Impute mean duration per patient per drug if missing or if  $> 56$
7. If still missing, impute mean duration per patient
8. If two scripts on the same day, replace the first numdays (currently 0) to be the same as the last script on that day
9. If two scripts within 7 days of each other for different prodcodes then used qty/ndd for script duration
10. If duration is still less than 7 days, replace as missing (likely prescribed alongside another drug)
11. Impute mean duration per patient per drug if missing
12. If still missing, use mean duration of overall prodcode specific mean
13. If still missing and within 7 days of another script use duration from that script
14. Generate end date of treatment period as the eventdate+duration for the last script in that period
15. If end of treatment period is within 56 days of the start of the next treatment period, then join treatment periods
16. Calculate total treatment duration as difference between treatment end date and treatment start date

AURUM: As above with GOLD, excluding using qty/daily\_dose if numdays missing as daily\_dose is not available in AURUM

### **Numeric daily dose**

The numeric daily dose was the dose of the drug in mg that was estimated to have been prescribed for each day for the duration of a prescription. This was calculated differently in GOLD and in AURUM, according to the field available in the dataset.

#### **GOLD**

1. Generate numerical daily dose (ndd) as  $\text{daily\_dose} \times \text{strength}$  if not a capsule or tablet and less than 100 (but not 50)
2. Replace ndd as daily\_dose if not a capsule or tablet but  $\text{daily\_dose} > 100$  or  $= 50$
3. If it is a capsule or tablet then  $\text{ndd} = \text{daily\_dose}$ , if daily\_dose is  $> 24$
4. If a capsule or tablet and  $\text{daily\_dose} < 25$  then  $\text{ndd} = \text{daily\_dose} \times \text{strength}$
5. If missing, then use  $\text{daily\_dose} = \text{qty} / \text{treatment duration}$
6. If more than one script on the same day the sum the ndd and keep one script per person per day
7. Set upper and lower limits of possible daily doses based on BNF (300 – 4800 for gabapentin, 50-600 for pregabalin)
8. Calculate average daily dose for treatment period as mean of ndd in that period

#### **AURUM:**

As for GOLD, but more missing information on quantity and dose. Therefore,

1. Replace daily dose with  $18000 / \text{duration\_trt}$  if  $\text{unit} = \text{"pack"}$  &  $\text{ndd} =$ .
2. Where quantity is missing or  $< 1$ , replace with mean value for that product code for that person, if still missing replace with mean value for that product code overall.
3. Where duration\_trt is missing or  $< 1$ , replace with mean value for that product code for that person, if still missing replace with mean value for that product code overall.
4. Where strength is missing or  $< 1$ , replace with mean value for that product code for that person, if still missing replace with mean value for that product code overall.

### **Co-prescriptions**

Durations of treatment were calculated for prescriptions for all drugs considered in the study. Drugs were considered to be co-prescribed with gabapentoids where the estimated treatments periods (start and end dates) of the gabapentinoid and potentially interacting drug overlapped. First and later treatment periods were included in this definition.

### **Licensed indications**

Licensed indications were neuropathic pain, epilepsy and anxiety (pregabalin only). Licensed indications defined by a clinical code for these conditions before the end of an individual's final treatment period.

### **Unlicensed indications**

Unlicensed indications were fibromyalgia, chronic back pain (without radiculopathy), chronic neck pain, osteoarthritis, chronic headache, migraine, chronic abdominal pain and restless legs syndrome. They were initially defined by a clinical code for these conditions in the period 14 days before to 90 days after incident gabapentinoid prescription. In a sensitivity analysis, this period was widened to 30 days before to 90 days after the incident gabapentinoid prescription.

### **Prescribing pathway**

Drugs on the prescribing pathway were opioids, benzodiazepines, Z-drug hypnotics (zopiclone and zolpidem), and antidepressants. Prescribing of these drugs was considered in the 12 months prior to the incident gabapentinoid prescription. All individuals were required to have 12 months of up-to-standard (CPRD's marking of quality) data before the incident gabapentinoid prescription.

### **Mid-year population for prevalence calculations**

Both the GOLD and AURUM datasets are provided with a "Denominator file" that includes the ID number and the start and end registration dates of all individuals ever included in the dataset. We used this to calculate the period for which individuals were at risk of a prescription. The mid-year population estimates were the number of people (aged  $\leq 18$  years) contributing to the dataset on 1<sup>st</sup> July each year (i.e. where 1<sup>st</sup> July in a given year fell between their start and end dates) was considered the mid-year population.

### **Joinpoint Analysis**

Joinpoint selects the final model using two different methods: Permutation Test and Bayesian Information Criterion (BIC). However, the Joinpoint software uses a sequence of permutation tests to select the final model as a default method. Each one of the permutation tests performs a test of the null hypothesis  $H_0$ : number of joinpoints =  $k_a$  against the alternative  $H_a$ : number of joinpoints =  $k_b$  where  $K_a < K_b$ . The procedure begins with  $k_a = \text{MIN}$  and  $k_b = \text{MAX}$ . If the null is rejected, then increase  $k_a$  by 1; otherwise, decrease  $k_b$  by 1. The procedure continues until  $k_a = k_b$  and the final value of is the selected number of joinpoints.

| Year    | AURUM                   |                         | GOLD                    |                         | Combined                |                         |
|---------|-------------------------|-------------------------|-------------------------|-------------------------|-------------------------|-------------------------|
|         | Gabapentin              | Pregabalin              | Gabapentin              | Pregabalin              | Gabapentin              | Pregabalin              |
|         | Rate (95% CI)           |
| 1997-98 | 5.98 (5.37, 6.65)       | --                      | 7.63 (6.22, 9.35)       | --                      | 6.30 (5.73, 6.92)       | --                      |
| 1998-99 | 12.51 (11.64, 13.45)    | --                      | 16.14 (14.16, 18.38)    | --                      | 13.28 (12.47, 14.15)    | --                      |
| 1999-00 | 31.91 (30.52, 33.37)    | --                      | 43.63 (40.63, 46.85)    | --                      | 34.84 (33.55, 36.18)    | --                      |
| 2000-01 | 57.35 (55.50, 59.27)    | --                      | 78.32 (74.59, 82.23)    | --                      | 63.21 (61.51, 64.96)    | --                      |
| 2001-02 | 85.21 (82.98, 87.51)    | --                      | 116.53 (112.31, 120.90) | --                      | 94.86 (92.83, 96.93)    | --                      |
| 2002-03 | 120.80 (118.16, 123.50) | --                      | 160.83 (156.24, 165.57) | --                      | 134.22 (131.88, 136.60) | --                      |
| 2003-04 | 150.43 (147.50, 153.41) | --                      | 205.62 (200.76, 210.60) | --                      | 170.58 (168.01, 173.19) | --                      |
| 2004-05 | 163.84 (160.81, 166.93) | 57.30 (55.52, 59.13)    | 231.78 (226.83, 236.84) | 84.93 (81.97, 88.00)    | 190.05 (187.39, 192.76) | 68.15 (66.57, 69.78)    |
| 2005-06 | 168.29 (165.24, 171.40) | 118.17 (115.63, 120.77) | 236.13 (231.20, 241.16) | 158.58 (154.57, 162.69) | 194.64 (191.97, 197.35) | 133.68 (131.48, 135.91) |
| 2006-07 | 176.28 (173.18, 179.43) | 124.78 (122.18, 127.42) | 264.27 (259.10, 269.53) | 157.16 (153.21, 161.21) | 211.23 (208.47, 214.04) | 136.99 (134.79, 139.23) |
| 2007-08 | 212.91 (209.53, 216.35) | 128.00 (125.39, 130.66) | 310.01 (304.48, 315.64) | 158.29 (154.38, 162.30) | 251.38 (248.39, 254.40) | 139.44 (137.25, 141.68) |
| 2008-09 | 249.78 (246.13, 253.48) | 152.96 (150.13, 155.85) | 350.98 (345.15, 356.91) | 197.27 (192.93, 201.70) | 289.61 (286.43, 292.83) | 170.00 (167.59, 172.45) |
| 2009-10 | 294.98 (291.03, 298.97) | 186.51 (183.40, 189.68) | 383.55 (377.51, 389.70) | 255.70 (250.80, 260.69) | 329.18 (325.81, 332.58) | 213.71 (211.01, 216.44) |
| 2010-11 | 337.38 (333.18, 341.63) | 229.63 (226.19, 233.13) | 410.18 (403.97, 416.48) | 287.41 (282.26, 292.66) | 365.01 (361.49, 368.56) | 251.82 (248.91, 254.75) |
| 2011-12 | 419.19 (414.52, 423.91) | 236.75 (233.26, 240.28) | 484.02 (477.32, 490.81) | 279.09 (274.05, 284.22) | 443.51 (439.66, 447.40) | 252.77 (249.88, 255.69) |
| 2012-13 | 469.30 (464.39, 474.27) | 259.59 (255.95, 263.27) | 525.05 (518.13, 532.08) | 298.13 (292.96, 303.39) | 490.09 (486.06, 494.15) | 274.14 (271.15, 277.17) |
| 2013-14 | 559.70 (554.28, 565.18) | 292.72 (288.82, 296.66) | 564.39 (557.25, 571.61) | 317.50 (312.20, 322.88) | 561.43 (557.10, 565.78) | 302.10 (298.95, 305.28) |
| 2014-15 | 609.51 (603.87, 615.20) | 307.28 (303.32, 311.30) | 569.61 (562.50, 576.81) | 313.48 (308.26, 318.78) | 595.08 (590.65, 599.54) | 309.59 (306.42, 312.78) |
| 2015-16 | 644.70 (638.93, 650.51) | 326.29 (322.23, 330.39) | 545.87 (538.95, 552.88) | 300.08 (295.01, 305.23) | 610.10 (605.63, 614.60) | 316.87 (313.69, 320.08) |
| 2016-17 | 684.52 (678.63, 690.46) | 345.10 (340.97, 349.27) | 504.45 (497.83, 511.15) | 270.89 (266.11, 275.76) | 624.57 (620.07, 629.10) | 319.87 (316.70, 323.08) |
| 2017-18 | 624.49 (618.92, 630.12) | 361.13 (356.94, 365.36) | 442.58 (436.42, 448.81) | 263.05 (258.37, 267.82) | 564.92 (560.67, 569.20) | 328.74 (325.54, 331.97) |
| 2018-19 | 540.39 (535.23, 545.60) | 363.62 (359.43, 367.86) | 356.34 (350.85, 361.90) | 244.32 (239.84, 248.89) | 481.52 (477.61, 485.47) | 325.11 (321.93, 328.32) |
| 2019    | 463.99 (457.20, 470.88) | 333.75 (325.51, 342.21) | 265.53 (258.89, 272.34) | 193.92 (185.85, 202.34) | 402.87 (397.77, 408.03) | 290.26 (284.07, 296.58) |

**Supplementary Table 1: Annual incidence rate of first gabapentinoid prescriptions (per 100,000 patient years) 1997 – 2019 resulting from meta-analysis of CPRD GOLD and AURUM data**

**Supplementary Table 2. Annual prevalence rate of gabapentinoid prescriptions (per 100,000 patient years) 1997 – 2019 resulting from meta-analysis of CPRD GOLD and AURUM data**

| Year    | AURUM                      |                            | GOLD                       |                            | Combined                   |                            |
|---------|----------------------------|----------------------------|----------------------------|----------------------------|----------------------------|----------------------------|
|         | Gabapentin                 | Pregabalin                 | Gabapentin                 | Pregabalin                 | Gabapentin                 | Pregabalin                 |
|         | Rate (95% CI)              |
| 1997-98 | 11.16 (9.10, 12.07)        | --                         | 12.80 (10.91, 15.01)       | --                         | 11.42 (10.61, 12.22)       | --                         |
| 1998-99 | 35.27 (33.78, 36.83)       | --                         | 38.79 (35.57, 42.31)       | --                         | 35.87 (34.48, 37.26)       | --                         |
| 1999-00 | 108.24 (105.64, 110.9)     | --                         | 119.16 (113.97, 124.59)    | --                         | 110.39 (108.04, 112.75)    | --                         |
| 2000-01 | 239.78 (235.95, 243.67)    | --                         | 263.10 (256.08, 270.31)    | --                         | 245.09 (241.7, 248.48)     | --                         |
| 2001-02 | 436.11 (431.00, 441.28)    | --                         | 479.12 (470.24, 488.16)    | --                         | 446.76 (442.3, 451.22)     | --                         |
| 2002-03 | 692.74 (686.38, 699.17)    | --                         | 718.87 (708.96, 728.91)    | --                         | 700.36 (694.98, 705.74)    | --                         |
| 2003-04 | 1018.59 (1010.96, 1026.28) | --                         | 1037.81 (1026.67, 1049.06) | --                         | 1024.72 (1018.4, 1031.05)  | --                         |
| 2004-05 | 1346.99 (1338.30, 1355.74) | --                         | 1394.36 (1382.19, 1406.64) | --                         | 1362.96 (1355.86, 1370.06) | --                         |
| 2005-06 | 1646.10 (1636.57, 1655.69) | 252.25 (248.51, 517.38)    | 1775.21 (1761.73, 1788.79) | 330.55 (324.72, 336.48)    | 1689.09 (1681.28, 1696.90) | 275.04 (271.87, 278.22)    |
| 2006-07 | 1927.28 (1917.07, 1937.54) | 512.04 (506.75, 753.09)    | 2178.88 (2164.14, 2193.72) | 617.07 (609.18, 625.05)    | 2008.76 (2000.34, 2017.18) | 544.57 (540.15, 548.98)    |
| 2007-08 | 2275.94 (2264.95, 2286.99) | 746.70 (740.36, 995.43)    | 2628.74 (2612.75, 2644.82) | 867.81 (858.56, 877.15)    | 2389.09 (2380.01, 2398.18) | 785.32 (780.07, 790.56)    |
| 2008-09 | 2650.45 (2638.70, 2662.26) | 988.15 (980.93, 1279.80)   | 3078.17 (3061.12, 3095.30) | 1120.10 (1109.73, 1130.56) | 2788.17 (2778.48, 2797.87) | 1031.25 (1025.30, 1037.20) |
| 2009-10 | 3094.22 (3081.61, 3106.88) | 1271.60 (1263.45, 1609.18) | 3564.7 (93546.60, 3582.90) | 1437.02 (1425.42, 1448.72) | 3247.75 (3237.38, 3258.12) | 1326.17 (1319.47, 1332.86) |
| 2010-11 | 3577.12 (3563.69, 3590.60) | 1600.06 (1590.99, 1947.32) | 4030.23 (4011.21, 4049.34) | 1822.96 (1810.03, 1835.97) | 3727.74 (3716.75, 3738.74) | 1673.48 (1666.04, 1680.93) |
| 2011-12 | 4166.57 (4152.18, 4181.01) | 1937.35 (1927.43, 2274.04) | 4539.16 (4519.17, 4559.23) | 2146.60 (2132.70, 2160.58) | 4293.72 (4282.02, 4305.42) | 2007.88 (1999.79, 2015.98) |
| 2012-13 | 4808.58 (4793.28, 4823.94) | 2263.35 (2252.72, 2661.14) | 5065.97 (5045.10, 5086.93) | 2429.98 (2415.34, 2444.71) | 4898.53 (4886.17, 4910.89) | 2320.83 (2312.21, 2329.46) |
| 2013-14 | 5606.15 (5589.59, 5622.77) | 2649.53 (2637.97, 3001.84) | 5549.44 (5527.84, 5571.12) | 2701.79 (2686.51, 2717.16) | 5585.16 (5571.99, 5598.32) | 2668.53 (2659.29, 2677.77) |
| 2014-15 | 6316.55 (6299.09, 6334.06) | 2989.58 (2977.36, 3272.71) | 5874.10 (5852.14, 5896.14) | 2920.54 (2904.83, 2936.34) | 6145.30 (6131.61, 6158.99) | 2963.60 (2953.93, 2973.26) |
| 2015-16 | 6934.99 (6916.91, 6953.11) | 3260.04 (3247.41, 3524.77) | 6115.29 (6093.11, 6137.54) | 3044.55 (3028.66, 3060.52) | 6607.98 (6593.95, 6622.01) | 3176.68 (3166.78, 3186.59) |
| 2016-17 | 7439.18 (7420.69, 7457.72) | 3511.76 (3498.80, 3725.63) | 6127.18 (6105.10, 6149.33) | 3089.71 (3073.79, 3105.70) | 6898.52 (6884.32, 6912.71) | 3343.56 (3333.49, 3353.63) |
| 2017-18 | 7777.84 (7759.17, 7796.55) | 3712.41 (3699.24, 3896.24) | 6040.80 (6019.07, 6062.61) | 3047.98 (3032.31, 3063.73) | 7040.68 (7026.50, 7054.86) | 3437.52 (3427.42, 3447.63) |
| 2018-19 | 7898.15 (7879.51, 7916.83) | 3882.85 (3869.50, 3936.33) | 5869.80 (5848.48, 5891.19) | 3063.55 (3047.94, 3079.25) | 7019.75 (7005.69, 7033.80) | 3537.37 (3527.20, 3547.54) |
| 2019    | 7806.03 (7787.44, 7824.66) | 3922.85 (3909.40, 3936.33) | 5595.16 (5574.47, 5615.92) | 2980.54 (2965.24, 2995.91) | 6818.99 (6805.14, 6832.84) | 3512.45 (3502.34, 3522.57) |

**Supplementary Table 3. Incidence of first gabapentinoid prescriptions (per 100,000 patient years), by age group and sex, 1997- 2019, resulting from meta-analysis of CPRD GOLD and AURUM data**

| Characteristics     | Gabapentin     |        |        | Pregabalin     |        |        |
|---------------------|----------------|--------|--------|----------------|--------|--------|
|                     | Incidence rate | 95% CI |        | Incidence rate | 95% CI |        |
|                     |                | LCL    | UCL    |                | LCL    | UCL    |
| <b>Overall</b>      | 332.68         | 331.94 | 333.42 | 239.60         | 238.88 | 240.33 |
| <b>By age group</b> |                |        |        |                |        |        |
| 18-24               | 57.06          | 56.13  | 58.01  | 49.91          | 48.92  | 50.93  |
| 25-34               | 130.77         | 129.68 | 131.87 | 108.48         | 107.31 | 109.65 |
| 35-44               | 249.71         | 248.23 | 251.20 | 196.03         | 194.50 | 197.58 |
| 45-54               | 389.69         | 387.77 | 391.62 | 282.90         | 281.02 | 284.79 |
| 55-64               | 473.47         | 471.13 | 475.82 | 320.38         | 318.18 | 322.60 |
| 65-75               | 572.77         | 569.83 | 575.72 | 377.83         | 375.10 | 380.59 |
| 75+                 | 587.63         | 584.56 | 590.71 | 409.63         | 406.68 | 412.60 |
| <b>By sex</b>       |                |        |        |                |        |        |
| Male                | 259.18         | 258.26 | 260.11 | 181.38         | 180.48 | 182.28 |
| Female              | 404.96         | 403.81 | 406.11 | 296.94         | 295.81 | 298.08 |

**Supplementary Table 4. Licensed and unlicensed indications resulting from meta-analysis of CPRD GOLD and AURUM data.**

| Indication             | Gabapentin                                                                                                     |                                                                                                                | Pregabalin                                                                                                     |                                                                                                                |
|------------------------|----------------------------------------------------------------------------------------------------------------|----------------------------------------------------------------------------------------------------------------|----------------------------------------------------------------------------------------------------------------|----------------------------------------------------------------------------------------------------------------|
|                        | Percentage of cohort (95% CI) with indication recorded ever before end of final treatment period               |                                                                                                                | Percentage of cohort (95% CI) with indication recorded ever before end of final treatment period               |                                                                                                                |
| Epilepsy               | 2.3 (2.3, 2.4)                                                                                                 |                                                                                                                | 2.9 (2.9, 3.0)                                                                                                 |                                                                                                                |
| Neuropathic pain       | 34.6 (34.5, 34.7)                                                                                              |                                                                                                                | 33.9 (33.8, 34.1)                                                                                              |                                                                                                                |
| Anxiety                | 10.1 (10.0, 10.2)†                                                                                             |                                                                                                                | 14.6 (14.5, 14.7)                                                                                              |                                                                                                                |
| Unlicensed             | Percentage of cohort (95% CI) with indication recorded (14 days before to 90 days after incident prescription) | Percentage of cohort (95% CI) with indication recorded (30 days before to 90 days after incident prescription) | Percentage of cohort (95% CI) with indication recorded (14 days before to 90 days after incident prescription) | Percentage of cohort (95% CI) with indication recorded (30 days before to 90 days after incident prescription) |
| Chronic abdominal pain | 0.3 (0.3, 0.3)                                                                                                 | 0.4 (0.3, 0.4)                                                                                                 | 0.4 (0.4, 0.4)                                                                                                 | 0.5 (0.4, 0.5)                                                                                                 |
| Chronic back pain      | 14.6 (14.6, 14.7)                                                                                              | 15.8 (15.7, 15.9)                                                                                              | 12.6 (12.5, 12.7)                                                                                              | 13.7 (13.6, 13.8)                                                                                              |
| Chronic headache       | 0.03 (0.02, 0.03)                                                                                              | 0.03 (0.03, 0.04)                                                                                              | 0.02 (0.02, 0.03)                                                                                              | 0.03 (0.02, 0.03)                                                                                              |
| Chronic neck pain      | 0.8 (0.8, 0.8)                                                                                                 | 0.9 (0.9, 0.9)                                                                                                 | 0.7 (0.7, 0.7)                                                                                                 | 0.8 (0.7, 0.8)                                                                                                 |
| Fibromyalgia           | 1.3 (1.3, 1.3)                                                                                                 | 1.4 (1.3, 1.4)                                                                                                 | 2.0 (2.0, 2.1)                                                                                                 | 2.2 (2.1, 2.2)                                                                                                 |
| Migraine               | 0.2 (0.2, 0.2)                                                                                                 | 0.2 (0.2, 0.2)                                                                                                 | 0.2 (0.1, 0.2)                                                                                                 | 0.2 (0.2, 0.2)                                                                                                 |
| Osteoarthritis         | 1.3 (1.3, 1.4)                                                                                                 | 1.5 (1.4, 1.5)                                                                                                 | 1.1 (1.0, 1.1)                                                                                                 | 1.2 (1.1, 1.2)                                                                                                 |
| Restless legs          | 0.6 (0.6, 0.7)                                                                                                 | 0.7 (0.7, 0.7)                                                                                                 | 0.5 (0.4, 0.5)                                                                                                 | 0.5 (0.5, 0.5)                                                                                                 |

†Anxiety is not a licensed indication for gabapentin, only licensed for pregabalin



Supplementary Figure 1: Joinpoint Analysis Annual trend in incident gabapentinoid prescribing per 100,000 patient years (1997-2019)

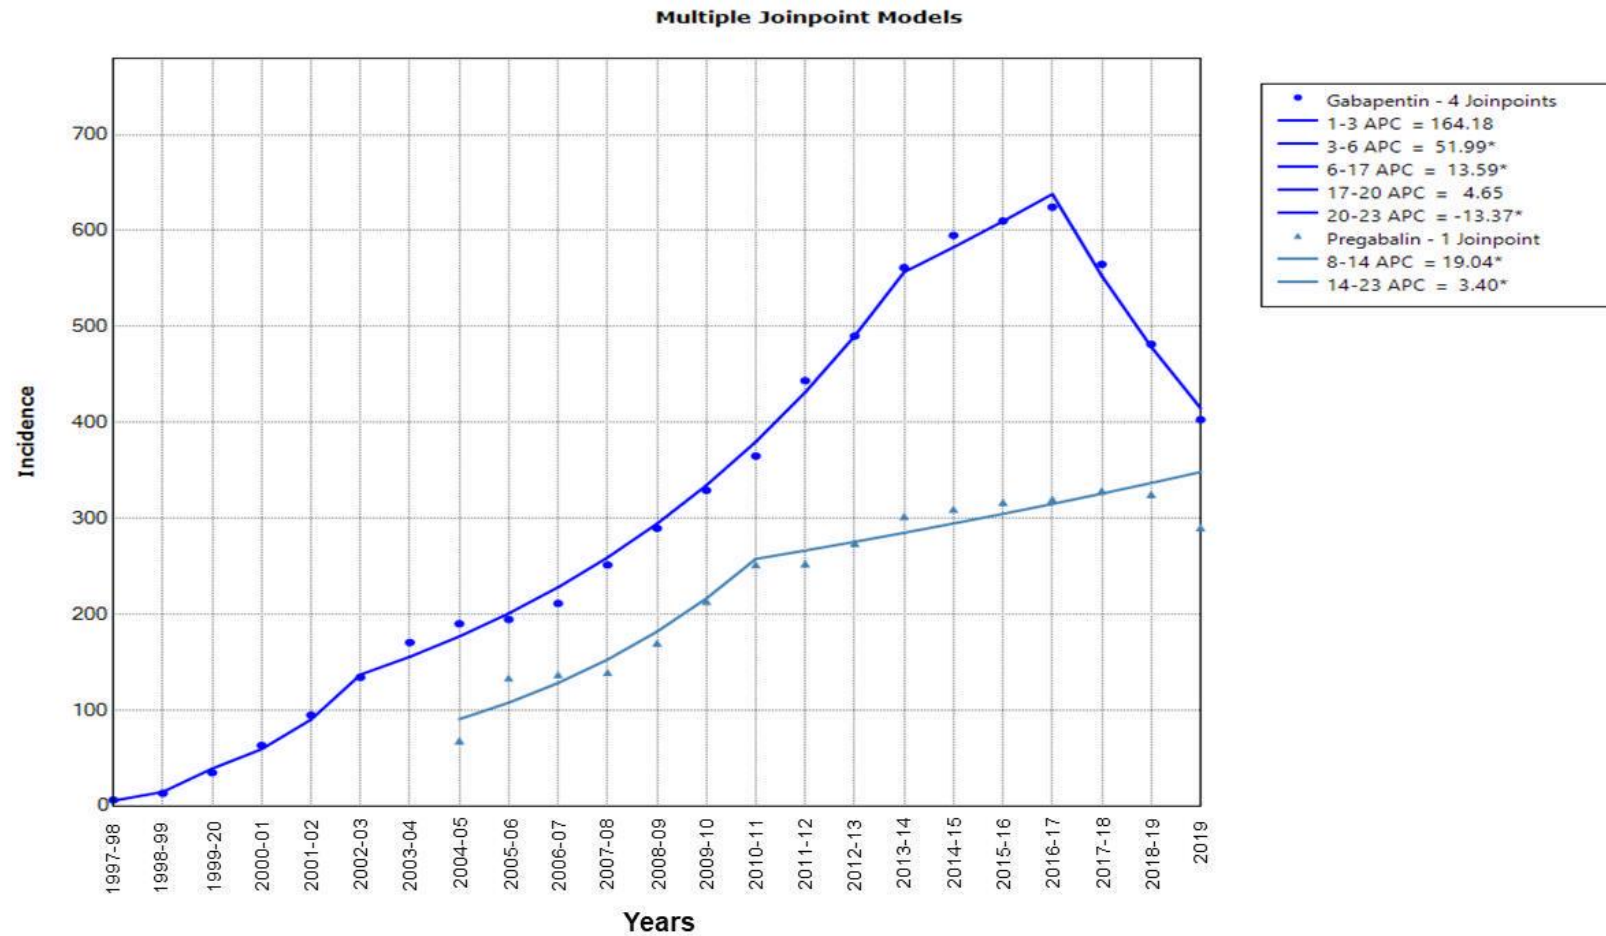

Supplementary Figure 2: Joinpoint Analysis Monthly trend in incident gabapentinoid prescribing per 100,000 patient years (Oct-2017 to Sep-2019)

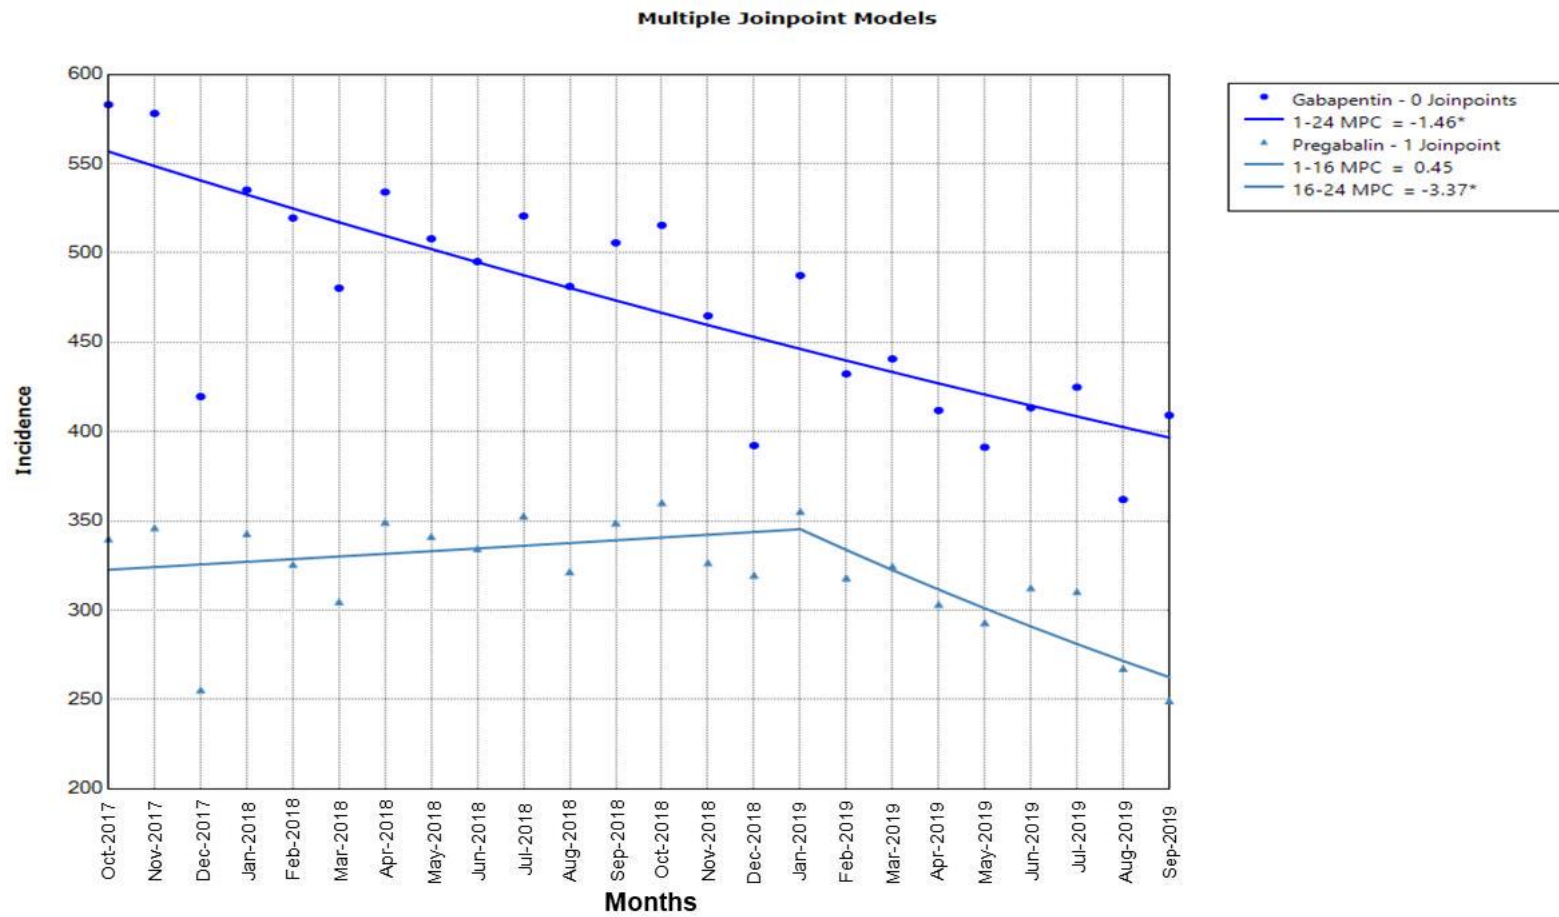

Supplementary Figure 3: Joinpoint Analysis Annual trend in prevalent gabapentinoid prescribing 100,000 patient years (1997-2019)

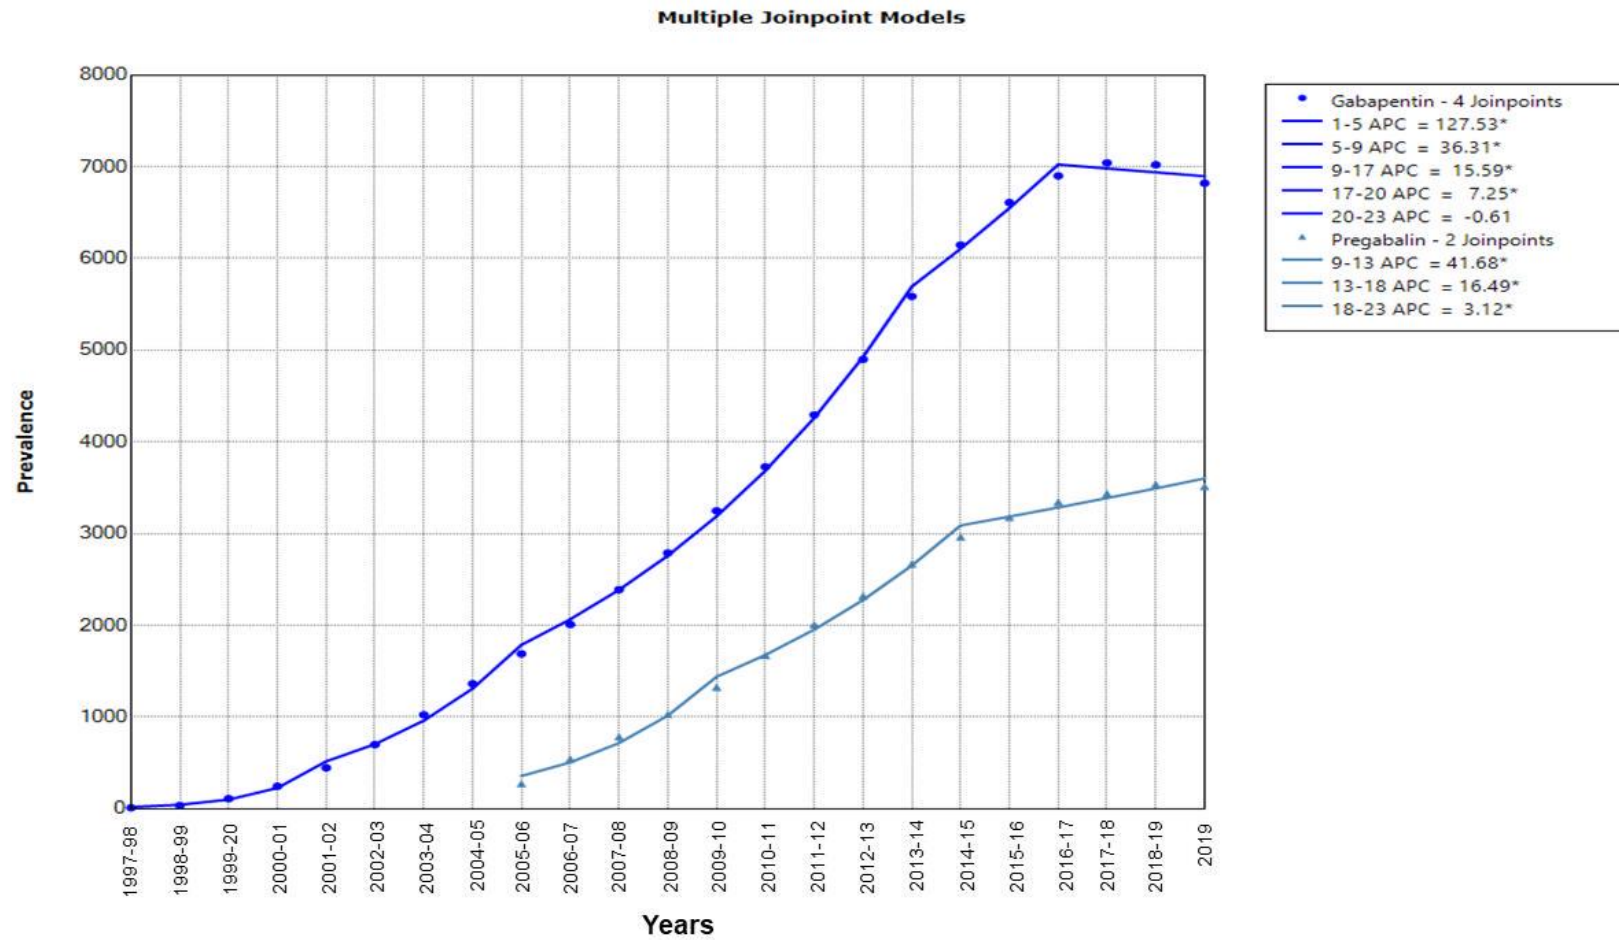

Supplementary Figure 4: Joinpoint Analysis Monthly trend in prevalent gabapentinoid prescribing 100,000 patient years (Oct-2017 to Sep-2019)

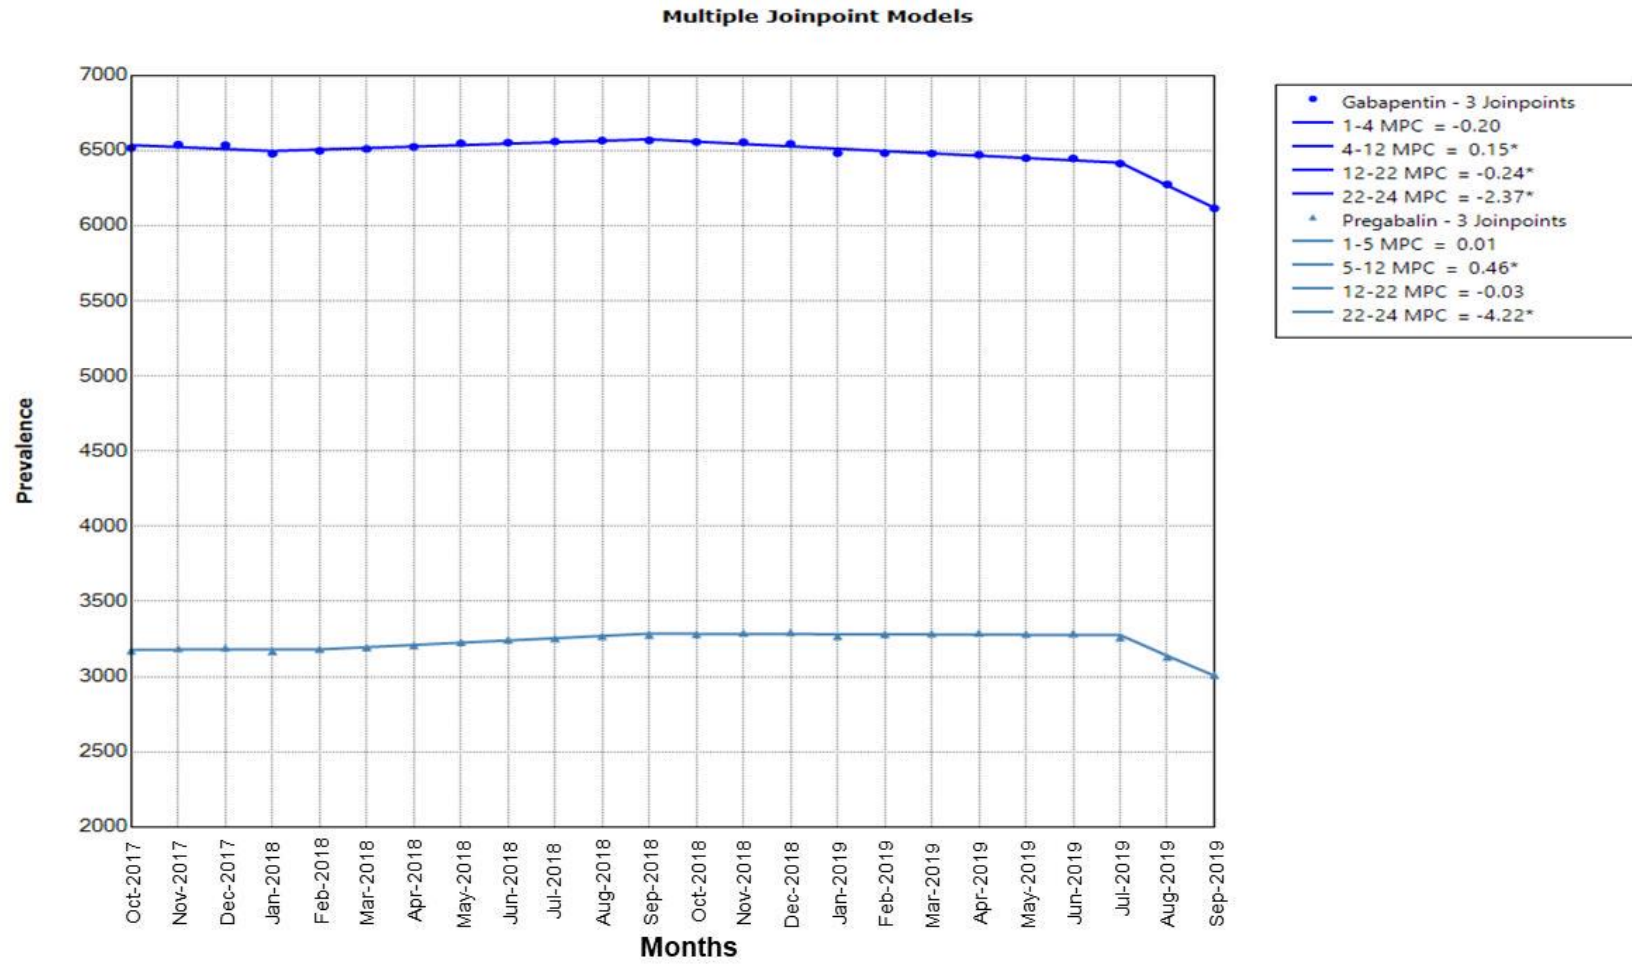

Supplement: mmc1.pdf [file mmc1.pdf]
